# Supplementary material
Source: PubMed Central journal article supplement (PMC7659554)
Supplement: mmc1.pdf [file mmc1.pdf]

**Cell Reports Medicine, Volume 1**

**Supplemental Information**

**Human iPSC-Derived Cardiomyocytes**

**Are Susceptible to SARS-CoV-2 Infection**

**Arun Sharma, Gustavo Garcia Jr., Yizhou Wang, Jasmine T. Plummer, Kouki Morizono, Vaithilingaraja Arumugaswami, and Clive N. Svendsen**

## **SUPPLEMENTAL INFORMATION**

### **Human iPSC-Derived Cardiomyocytes are Susceptible to SARS-CoV-2 Infection**

Arun Sharma, Gustavo Garcia Jr, Yizhou Wang, Jasmine T. Plummer, Kouki Morizono, Vaithilingaraja Arumugaswami, Clive N. Svendsen

SUPPLEMENTAL FIGURES

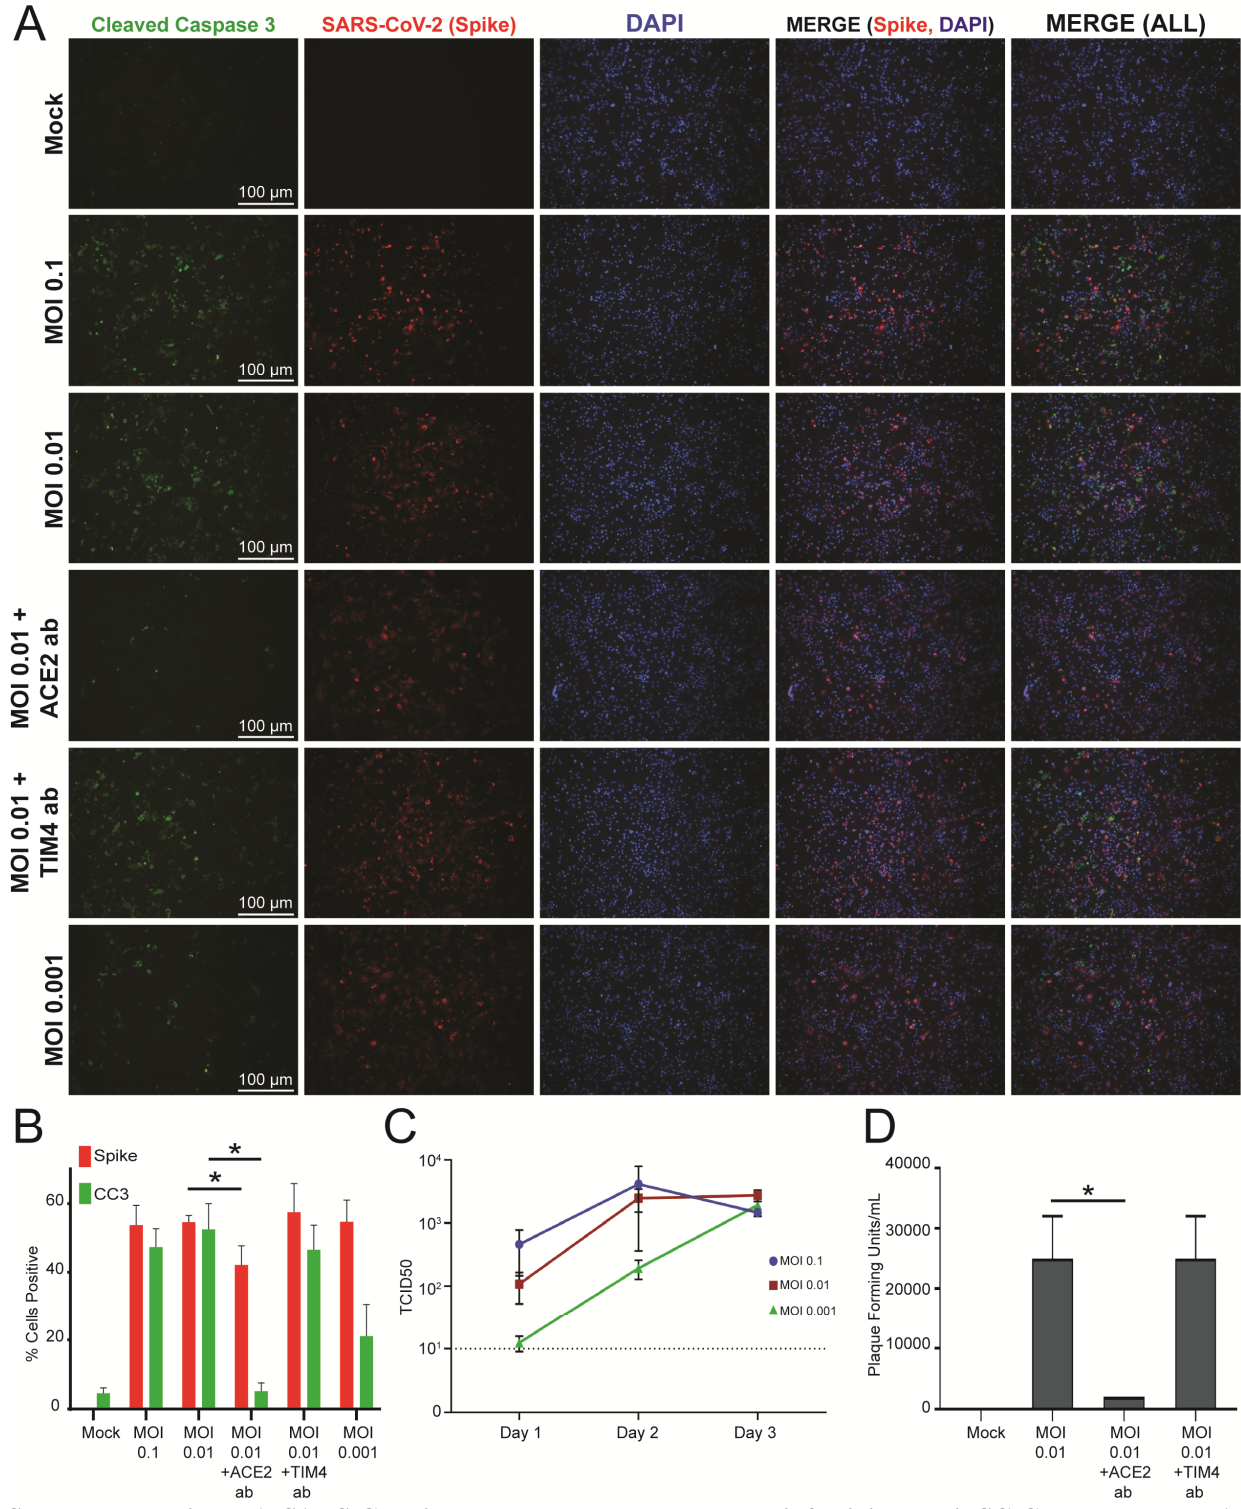

**Supplemental Figure 1: SARS-CoV-2 demonstrates dose-dependent infectivity on hiPSC-CMs, blunted by ACE2 antibody treatment. (Related to Figure 1). A** Immunofluorescence of infected hiPSC-CMs stained for apoptosis marker cleaved caspase-3 and SARS-CoV-2 spike protein. DAPI marks cell nuclei. Cells infected with SARS-CoV-2 for 3 days with MOI ranging from 0.001 to 0.1 exhibit viral protein expression and apoptosis. However, pre-treatment of infected hiPSC-CMs with ACE2 antibody significantly blunts spike protein and cleaved caspase-3 expression, suggesting the criticality of ACE2 in viral internalization. TIM4 antibody serves as a non-specific control. **B**) Quantification of immunofluorescence results. N=5 images quantified for each condition. DAPI was used to mark live cells for counting. \* indicates p<0.05. **C**) Viral infection kinetics timecourse using supernatant from infected hiPSC-CMs after 24-72 hours of SARS-CoV-2 infection confirms active viral production. TCID<sub>50</sub> (Median Tissue Culture Infectious Dose) determined per 25 microliters of supernatant. Dotted horizontal line shows detection limit. Uninfected samples did not have detectable viral load. **D**) Viral plaque assays conducted using supernatant from infected hiPSC-CMs after 72 hours of SARS-CoV-2 infection confirms active viral production, but blunted by ACE2 antibody treatment. \* indicates p<0.05
